# Supplementary material
Source: publisher figshare collection journal article supplement (https://acs.figshare.com/ndownloader/files/9237640)
Supplement: Supplementary file 1 [file 9237640]

Supporting Information for:

**Agar Aerogel Containing Small-Sized Zeolitic Imidazolate Framework Loaded Carbon Nitride: A Solar-Triggered Regenerable Decontaminant for Convenient and Enhanced Water Purification**

Wentao Zhang,<sup>†</sup> Shuo Shi,<sup>‡</sup> Wenxin Zhu,<sup>†</sup> Lunjie Huang,<sup>†</sup> Chengyuan Yang,<sup>†</sup> Sihang Li,<sup>†</sup>

Xinnan Liu,<sup>†</sup> Rong Wang,<sup>†</sup> Na Hu,<sup>§</sup> Yourui Suo,<sup>§</sup> Zhonghong Li,<sup>†</sup> Jianlong Wang\*,<sup>†</sup>

Number of pages: 25

Number of figures: 19

Number of Tables: 04

---

**Supporting Figures:**

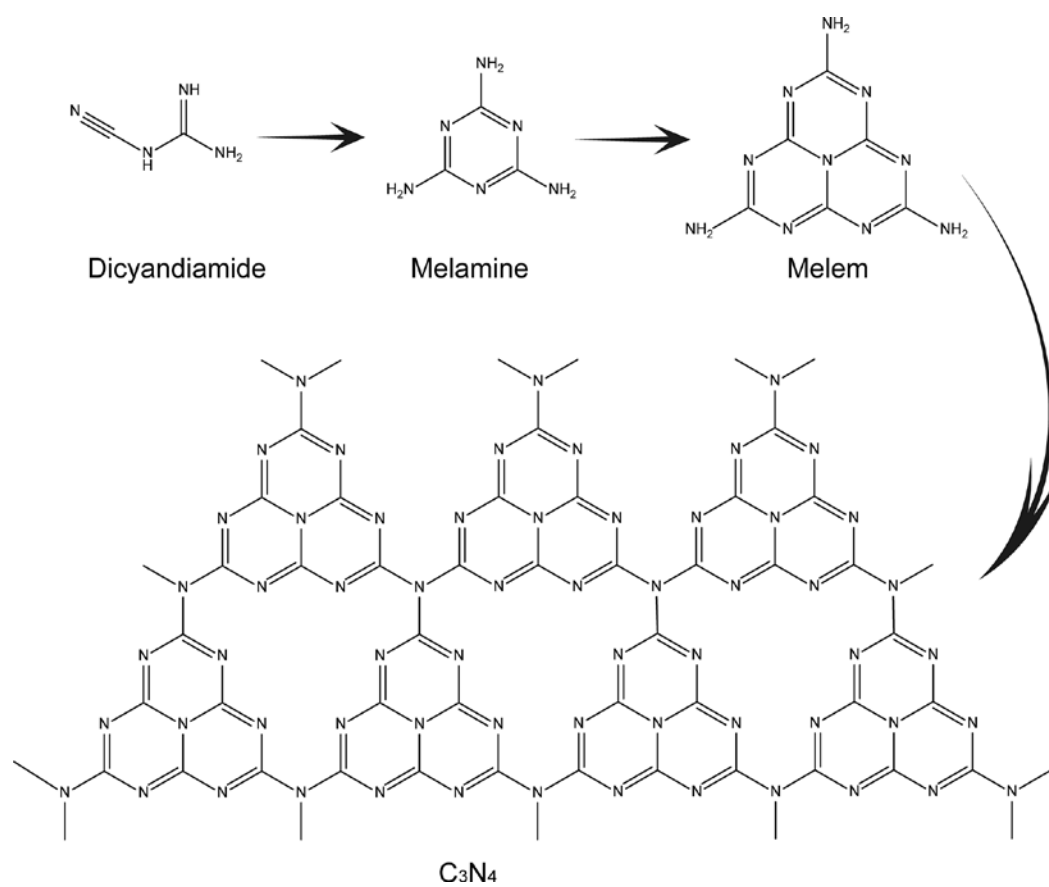

**Figure S1.** Reaction path for the formation of C<sub>3</sub>N<sub>4</sub> from dicyandiamide.

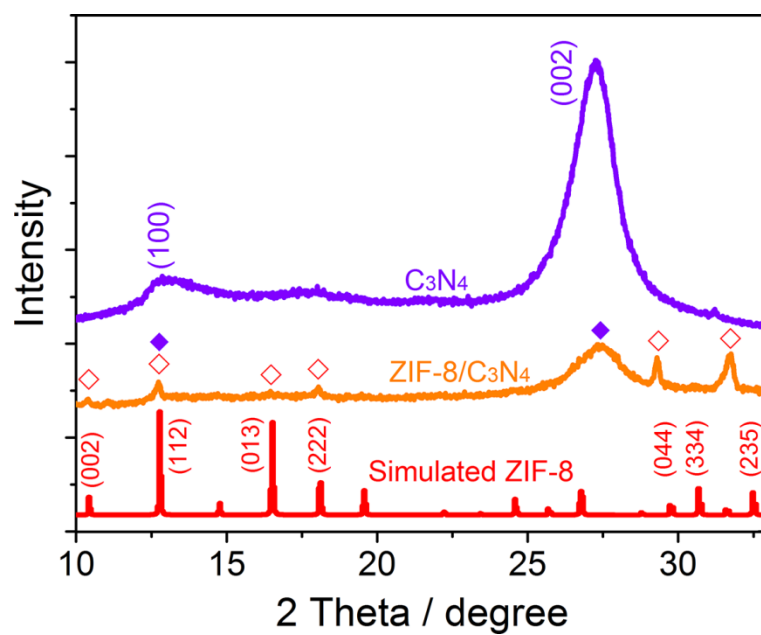

**Figure S2.** XRD patterns of  $C_3N_4$ , simulated ZIF-8 and the as-obtained ZIF-8/ $C_3N_4$ .

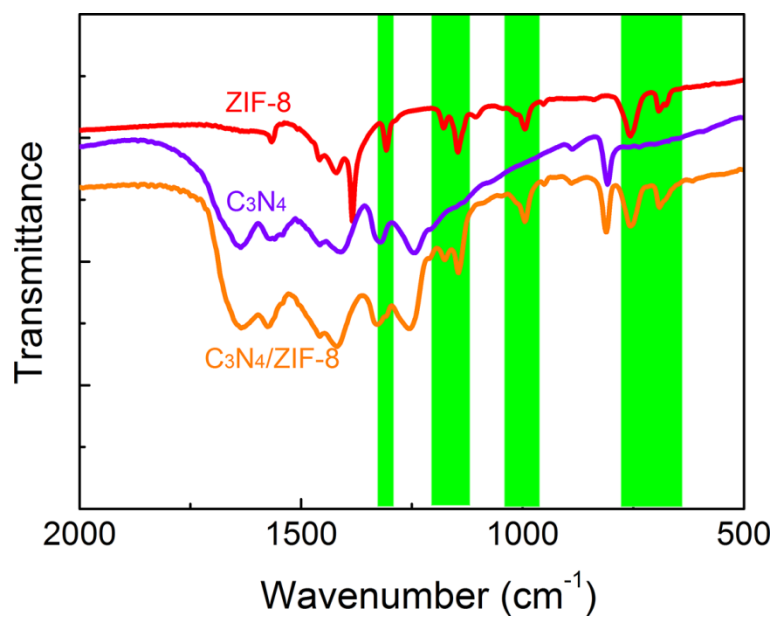

**Figure S3.** FT-IR spectra of C<sub>3</sub>N<sub>4</sub>, ZIF-8 and the as-obtained ZIF-8/C<sub>3</sub>N<sub>4</sub>.

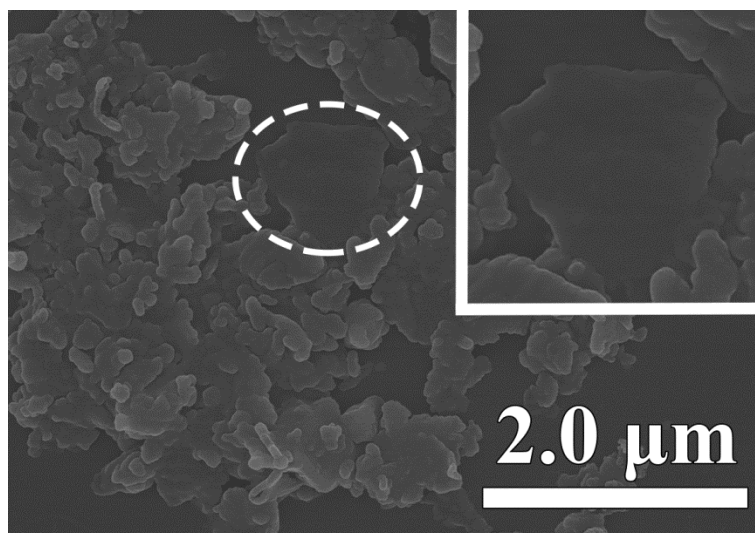

**Figure S4.** SEM image of C<sub>3</sub>N<sub>4</sub> nanosheets.

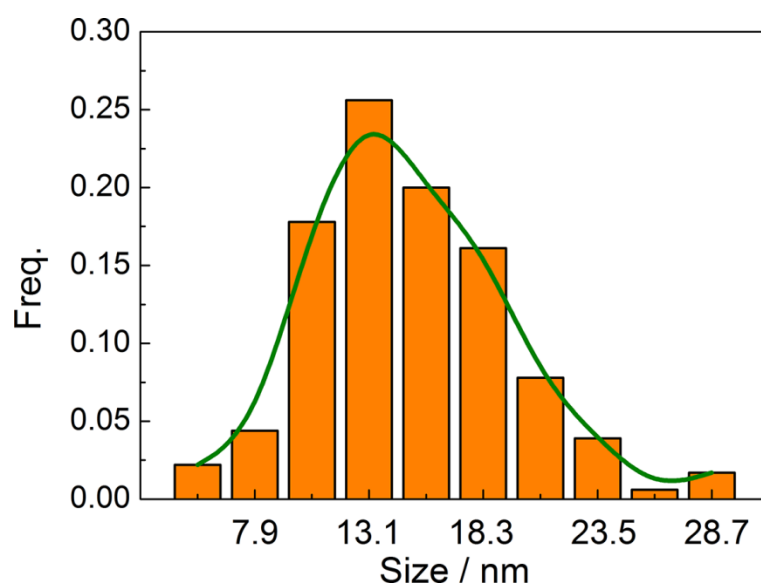

**Figure S5.** The size distribution of ZIF-8 nanoparticles on C<sub>3</sub>N<sub>4</sub>, over 150 particles were counted, indicating ZIF-8 nanoparticles possess average particle size, about 14.95 nm.

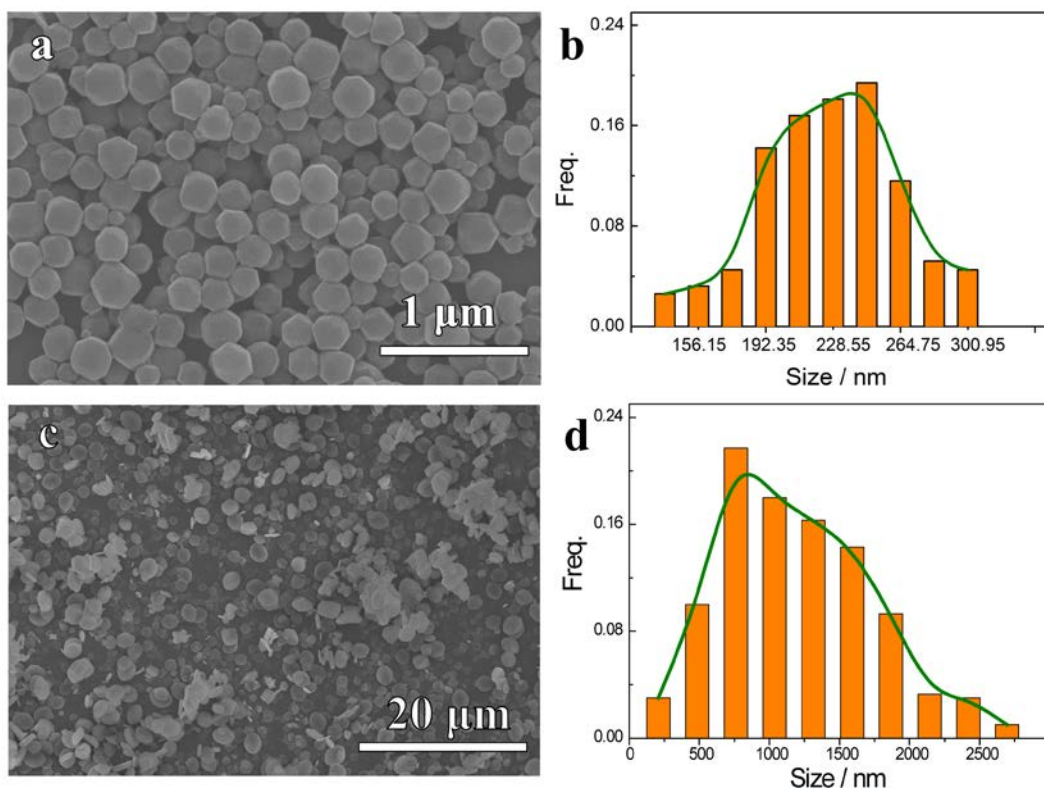

**Figure S6.** SEM image and size distribution of big-sized bulk ZIF-8, over 150 particles were counted. a, b) ZIF-8 nanoparticles, synthesized by a reported method,<sup>1</sup> possess average particle size of 227.61 nm. c,d) ZIF-8 nanoparticles with size of 1193.20 nm were synthesized by the same condition for ZIF-8/C<sub>3</sub>N<sub>4</sub> but without the presence of C<sub>3</sub>N<sub>4</sub>.

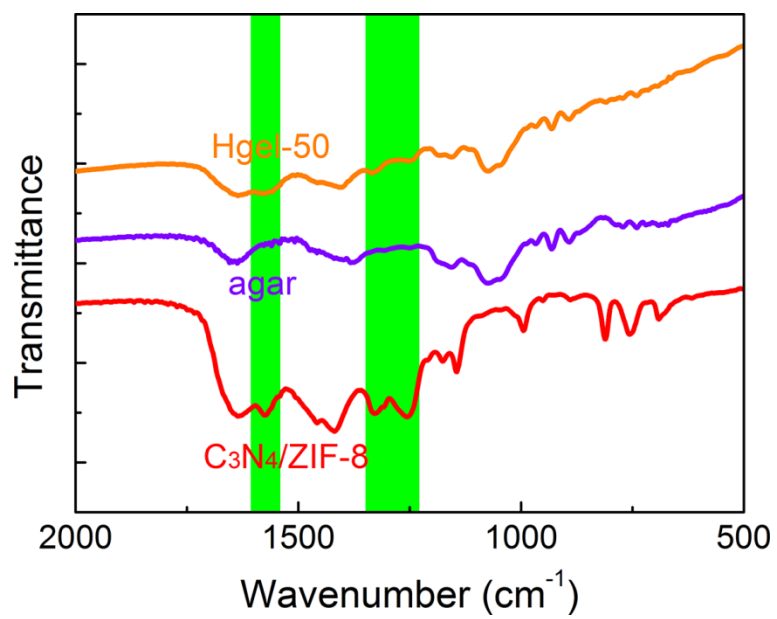

**Figure S7.** FT-IR spectra of agar, ZIF-8, C<sub>3</sub>N<sub>4</sub> and Hgel-50.



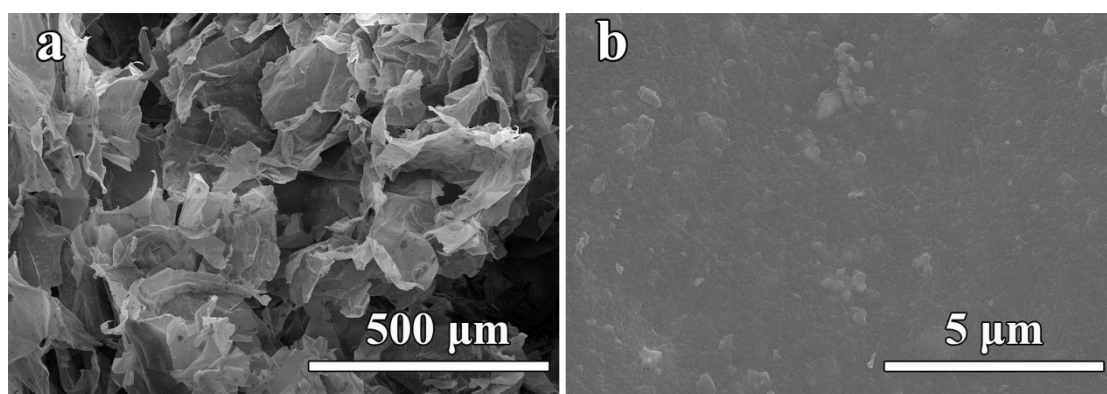

**Figure S8.** SEM of the hybrid aerogel containing 11.1% ZIF-8/C<sub>3</sub>N<sub>4</sub>.

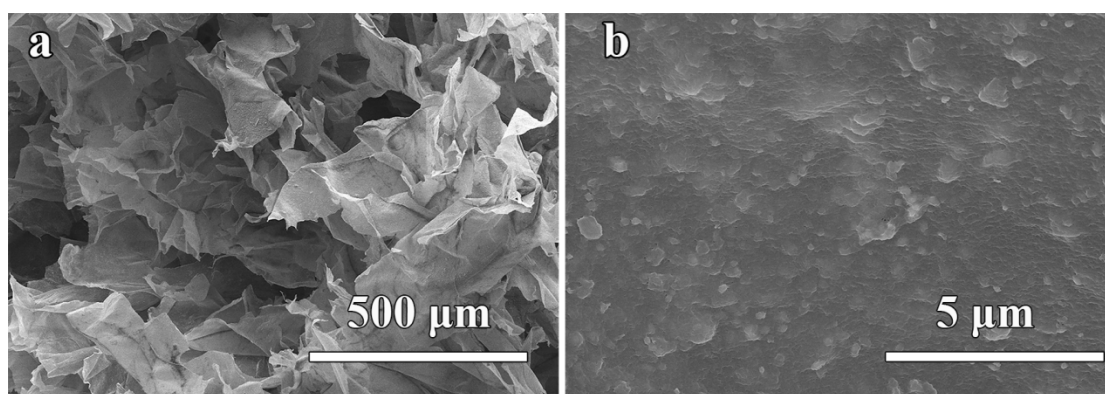

**Figure S9.** SEM of the hybrid aerogel containing 33.3% ZIF-8/C<sub>3</sub>N<sub>4</sub>.

**Table S1.** Adsorption capacities of various adsorbents for Congo red.

| Kind of adsorbent                            | Adsorption capacity $Q_t$ [ $\text{mg g}^{-1}$ ] |                         |
|----------------------------------------------|--------------------------------------------------|-------------------------|
|                                              | Detected <sup>a)</sup>                           | Simulated <sup>b)</sup> |
| Pure aerogel                                 | 8.23                                             | -                       |
| $\text{C}_3\text{N}_4$                       | 14.87                                            | -                       |
| Big-sized bulk ZIF-8                         | 789.73                                           | -                       |
| ZIF-8/ $\text{C}_3\text{N}_4$                | 504.42                                           | 352.71                  |
| 11.1% ZIF-8/ $\text{C}_3\text{N}_4$ -aerogel | 61.44                                            | 63.37                   |
| 33.3% ZIF-8/ $\text{C}_3\text{N}_4$ -aerogel | 178.63                                           | 173.46                  |
| 50% ZIF-8/ $\text{C}_3\text{N}_4$ -aerogel   | 260.21                                           | 256.33                  |

<sup>a)</sup>The data was the equilibrium absorption value in Figure 2b, which was conducted by soaking 5 mg adsorbent into 20 mL CR solution at 200 ppm over 10 h in a shaker; <sup>b)</sup>The simulated capacity of ZIF-8/ $\text{C}_3\text{N}_4$  was calculated according to the proportions and data measured for big-sized bulk ZIF-8 and  $\text{C}_3\text{N}_4$ ; the capacity of three hybrid aerogel was calculated based on the measured data for ZIF-8/ $\text{C}_3\text{N}_4$  and Pure aerogel.

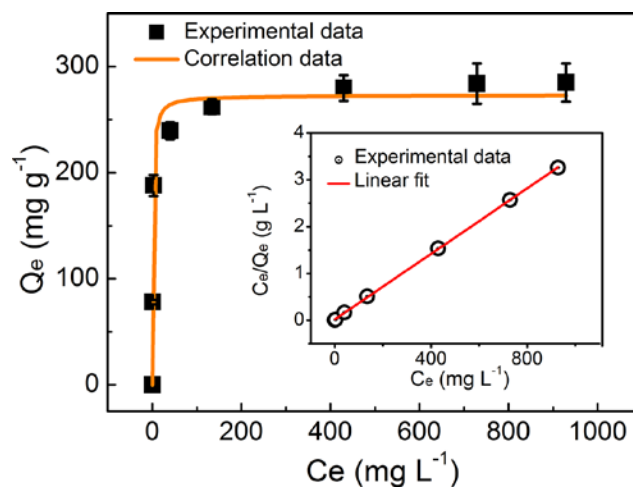

**Figure S10.** The adsorption isotherms of CR by Hgel-50 (correlation curve was drawn using the isotherm parameters calculated from the single-site adsorption isotherm model) and the linear fit of the model (inset).

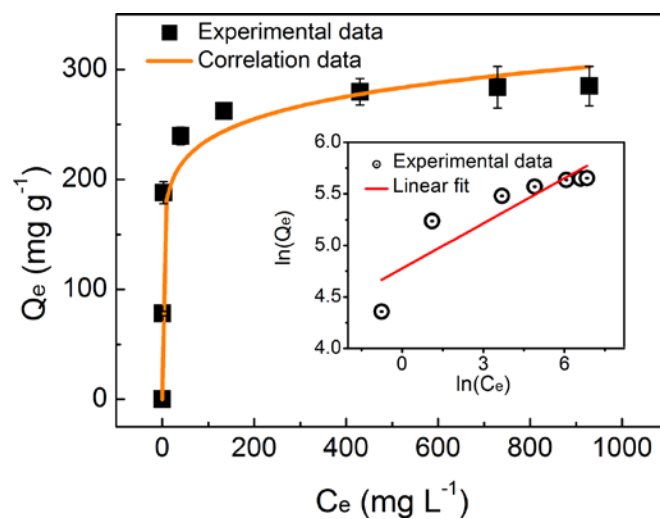

**Figure S11.** The adsorption isotherms of CR by Hgel-50 (correlation curve was drawn using the isotherm parameters calculated from the Freundlich isotherm model) and the linear fit of the model (inset).

**Table S2.** Thermodynamic parameters of Hgel-50 for CR adsorption.

|         | Single-site adsorption isotherm |                       |       | Dual-site adsorption isotherm |                       |       | Freundlich isotherm   |       |       |
|---------|---------------------------------|-----------------------|-------|-------------------------------|-----------------------|-------|-----------------------|-------|-------|
|         | $Q_m$                           | $K_L$                 | $R^2$ | $Q_m$                         | $K_d$                 | $R^2$ | $K_F$                 | $1/n$ | $R^2$ |
|         | (mg g <sup>-1</sup> )           | (L mg <sup>-1</sup> ) |       | (mg g <sup>-1</sup> )         | (L mg <sup>-1</sup> ) |       | (mg g <sup>-1</sup> ) |       |       |
| Hgel-50 | 272.87                          | 0.76                  | 0.985 | 287.35                        | 1.10                  | 0.995 | 141.56                | 0.11  | 0.929 |
|         | ±6.11                           | ±0.14                 |       | ±5.77                         | ±0.07                 |       | ±18.17                | ±0.02 |       |
| Hgel-Z  | 190.13                          | 0.14                  | 0.989 | 208.75                        | 0.24                  | 0.997 | 82.79                 | 0.13  | 0.942 |
|         | ±3.75                           | ±0.02                 |       | ±1.55                         | ±0.02                 |       | ±11.82                | ±0.03 |       |

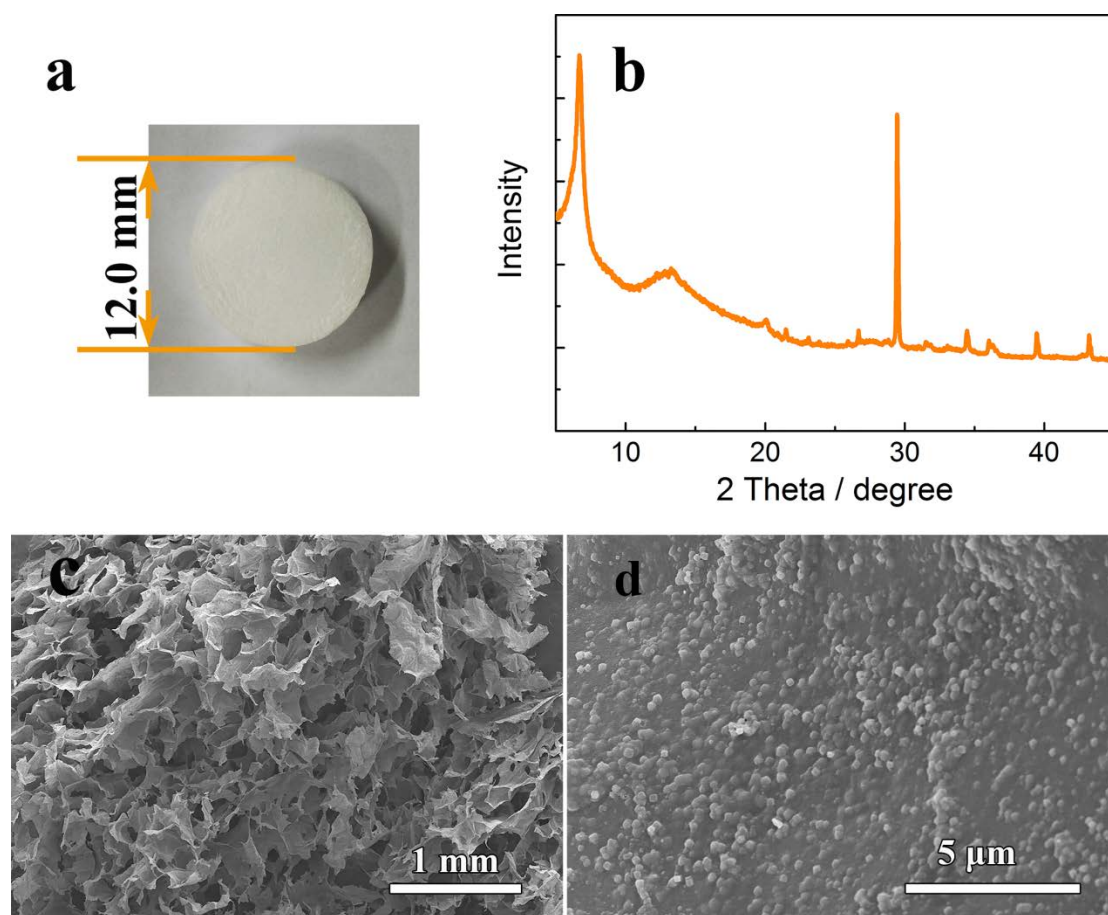

**Figure S12.** a) Photograph, b,c) SEM images and d) XRD pattern of aerogel containing 21.8% ZIF-8 (Hgel-Z).

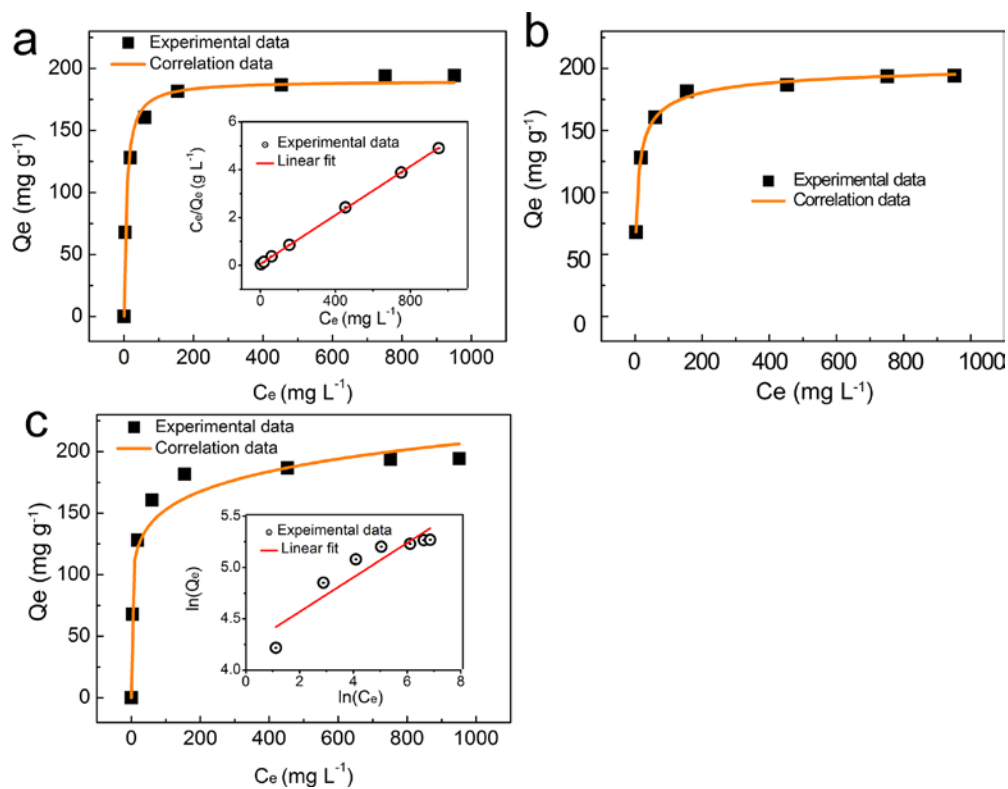

**Figure S13.** The single-site adsorption a), dual-site adsorption b) and Freundlich c) isotherm model for the adsorption isotherms of CR by Hgel-Z and the linear fit of the model (inset).



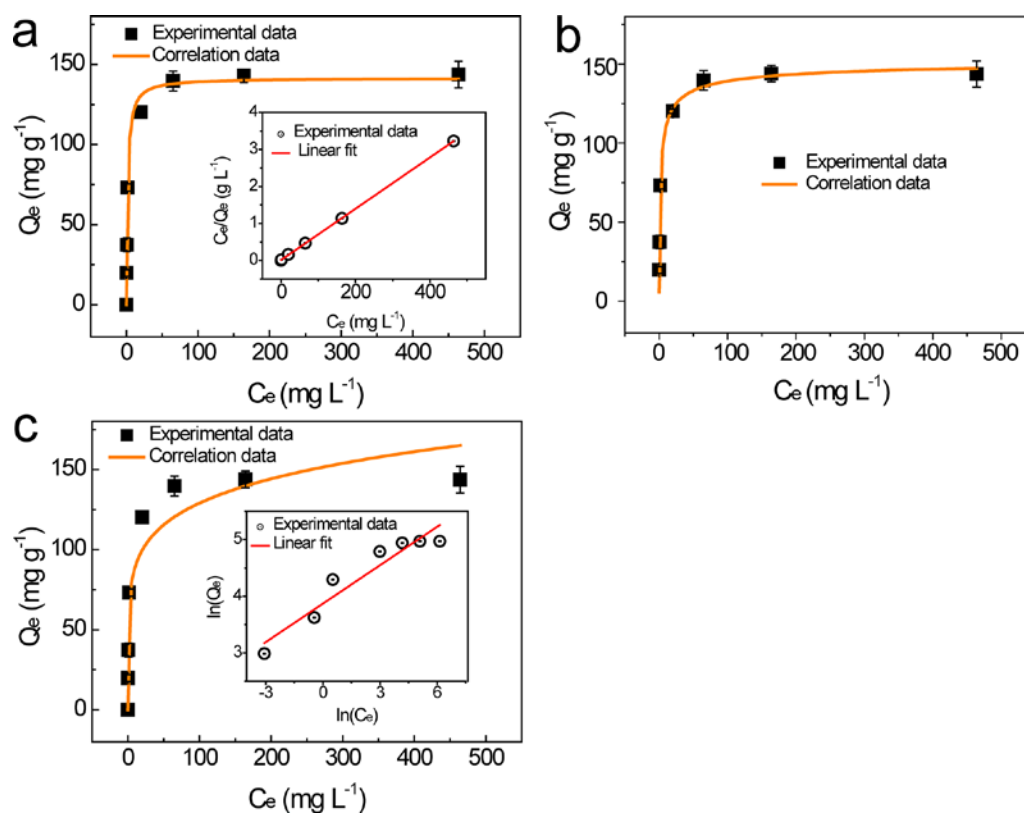

**Figure S14.** The single-site adsorption a), dual-site adsorption b) and Freundlich c) isotherm model for the adsorption isotherms of methylene blue by Hgel-50 and the linear fit of the model (inset).

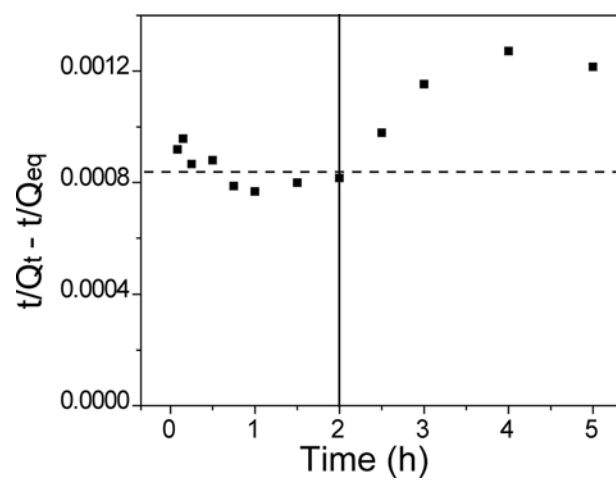

**Figure S15.** Invalidity of the pseudo-second-order conditions for the full time range of 5 hours.

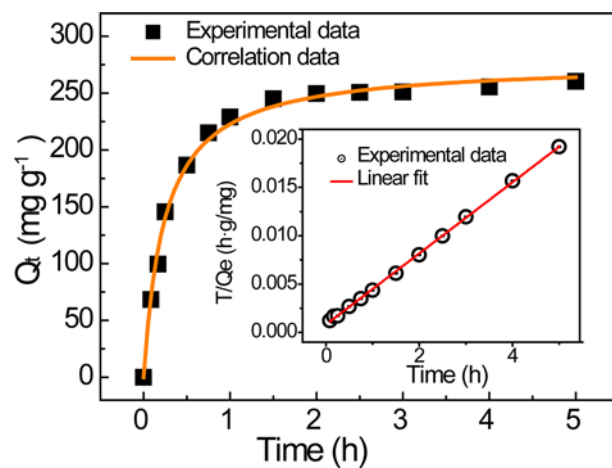

**Figure S16.** The adsorption kinetics of CR by Hgel-50 (correlation curve was drawn using the kinetic parameters calculated from the pseudo-second-order model of full time) and pseudo-second-order plots (inset).

**Table S3.** Adsorption kinetics parameters of Hgel-50 for CR adsorption.

| $Q_{e,exp}$<br>(mg g <sup>-1</sup> ) | Pseudo-first-order                 |                          |       | Pseudo-second-order                |                                                 |       | Pseudo-second-order                |                                                 |       |
|--------------------------------------|------------------------------------|--------------------------|-------|------------------------------------|-------------------------------------------------|-------|------------------------------------|-------------------------------------------------|-------|
|                                      | $Q_{e,c}$<br>(mg g <sup>-1</sup> ) | $k_1$ (h <sup>-1</sup> ) | $R^2$ | of full times                      |                                                 |       | of lower times                     |                                                 |       |
|                                      |                                    |                          |       | $Q_{e,c}$<br>(mg g <sup>-1</sup> ) | $k_2 \times 10^{-2}$<br>(g mg h <sup>-1</sup> ) | $R^2$ | $Q_{e,c}$<br>(mg g <sup>-1</sup> ) | $k_2 \times 10^{-2}$<br>(g mg h <sup>-1</sup> ) | $R^2$ |
| 260.21                               | 249.90                             | 3.05                     | 0.991 | 276.69                             | 1.49                                            | 0.995 | 288.59                             | 1.28                                            | 0.996 |
|                                      | $\pm 3.13$                         | $\pm 0.17$               |       | $\pm 3.44$                         | $\pm 0.11$                                      |       | $\pm 5.54$                         | $\pm 0.11$                                      |       |

| Intraparticle<br>diffusion model | Initial Phase                                       |                  |       | Secondary Phase                                     |                   |       |
|----------------------------------|-----------------------------------------------------|------------------|-------|-----------------------------------------------------|-------------------|-------|
|                                  | $K_{p1}$<br>(mg g <sup>-1</sup> h <sup>-0.5</sup> ) | $C_I$            | $R^2$ | $K_{p2}$<br>(mg g <sup>-1</sup> h <sup>-0.5</sup> ) | $C_I$             | $R^2$ |
|                                  | 256.24 $\pm$ 25.84                                  | 1.03 $\pm$ 15.29 | 0.961 | 20.84 $\pm$ 4.28                                    | 215.31 $\pm$ 7.04 | 0.792 |

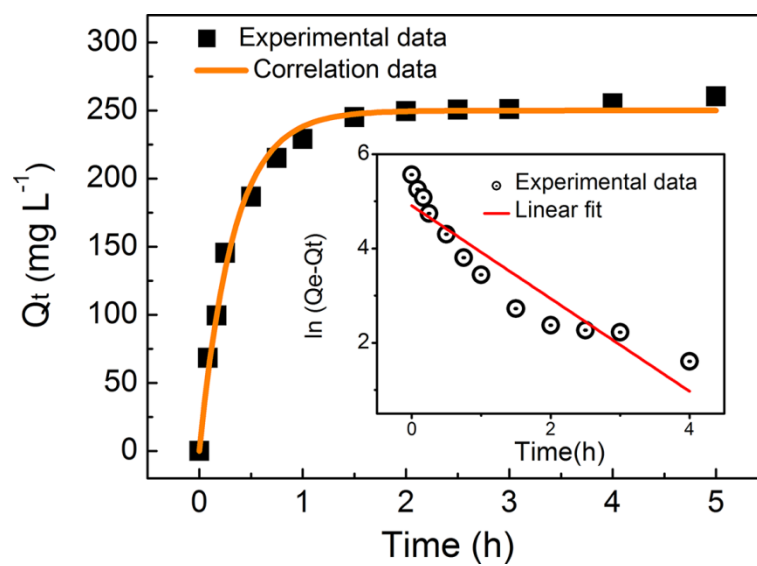

**Figure S17.** The adsorption kinetics of CR by Hgel-50 (correlation curve was drawn using the kinetic parameters calculated from the pseudo-first-order model of full time) and pseudo-first-order plots (inset).

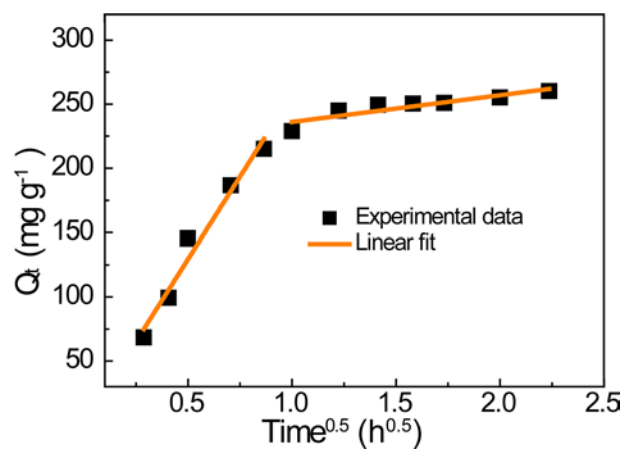

**Figure S18.** The intra-particle diffusion model for the adsorption of CR by Hgel-50.

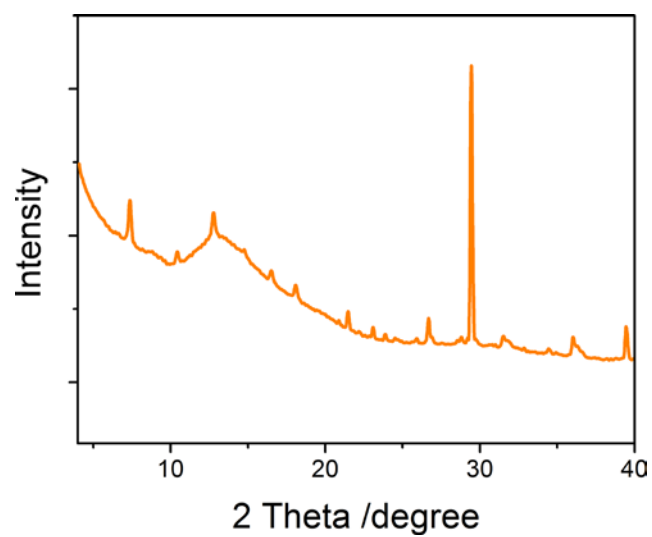

**Figure S19.** XRD pattern of the regenerated Hgel-50.

**Table S4.**  $\text{Zn}^{2+}$  concentration detected by atomic absorption spectrometer on pure water and water after treatment with Hgel-50.

|                                         | Pure water        | CR solution after<br>aerogel adsorption | CR solution after<br>synergistic removal |
|-----------------------------------------|-------------------|-----------------------------------------|------------------------------------------|
| $\text{Zn}^{2+}$ concentration<br>(ppm) | $0.088 \pm 0.016$ | $0.092 \pm 0.012$                       | $0.087 \pm 0.019$                        |



## Reference

1. Torad, N. L.; Hu, M.; Kamachi, Y.; Takai, K.; Imura, M.; Naito, M.; Yamauchi, Y. Facile synthesis of nanoporous carbons with controlled particle sizes by direct carbonization of monodispersed ZIF-8 crystals. *Chem. Commun.* **2013**, 49 (25), 2521-2523.
